# Supplementary material for: Additively manufactured thermosetting elastomer composites: small changes in resin formulation lead to large changes in mechanical and viscoelastic properties
Source: Royal Society of Chemistry journal article supplement (doi:10.1039/d2ma00892k), 2022-12-08
Supplement: d2ma00892k1.pdf [file d2ma00892k1.pdf]

## **Supporting Information**

### **Additively manufactured thermosetting elastomer composites: Small changes in resin formulation lead to large changes in mechanical and viscoelastic properties**

Ye Wang,<sup>a</sup> Ian M. McAninch,<sup>c</sup> Antoine P. Delarue,<sup>b</sup> Christopher J. Hansen,<sup>b</sup> E. Jason Robinette,<sup>c</sup>  
and Amy M. Peterson<sup>\*a</sup>

*<sup>a</sup>Department of Plastics Engineering, University of Massachusetts Lowell, Lowell, MA 01854, USA*

*<sup>b</sup>Department of Mechanical Engineering, University of Massachusetts Lowell, Lowell, MA 01854, USA*

*<sup>c</sup>Weapons and Materials Research Directorate, US Army Combat Capabilities Development Command-Armory  
Research Laboratory, Aberdeen Proving Ground, MD 21005, USA*

### Monomers added to the base resin system

**Table S1.** Descriptions of added monomers, molar percentage, short names, and corresponding chemical structures.

| Product name                | Molar percentage (mol.%) | Short name | Chemical structure                                                                  |
|-----------------------------|--------------------------|------------|-------------------------------------------------------------------------------------|
| 2-hydroxyethyl methacrylate | 7.18                     | HEMA       | 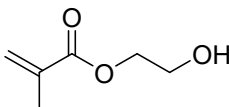 |
| 2-ethylhexyl acrylate       | 5.18                     | EHA        | 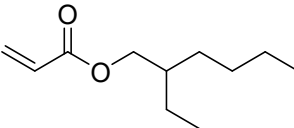 |

## Tensile testing

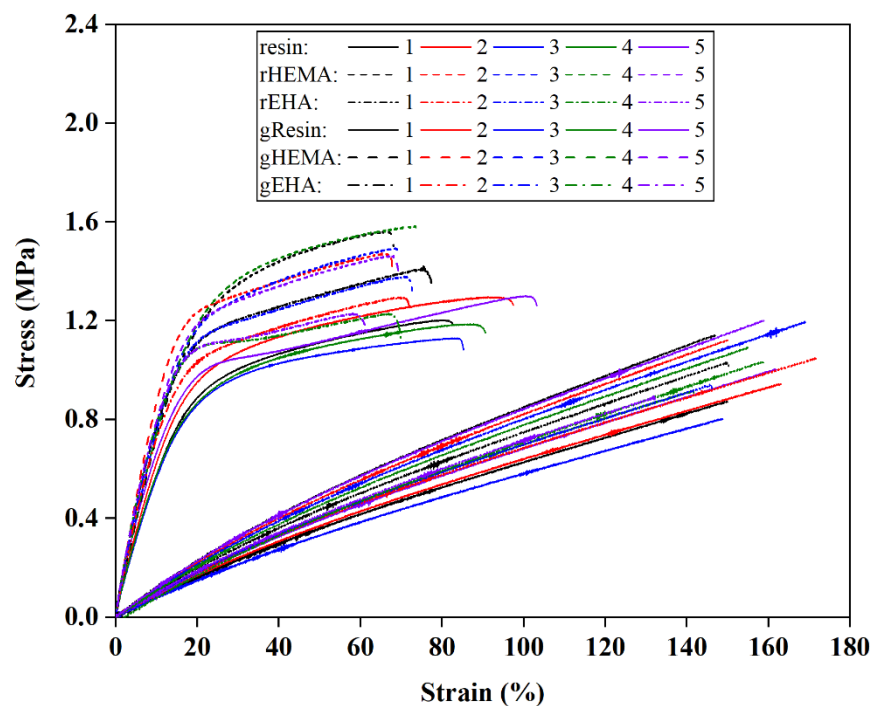

**Figure S1.** Stress-strain curves for neat and glass microsphere-filled samples from tensile testing.

**Table S2.** P-values for one-way ANOVA of given tensile properties for a given group.

| Groups                                                   | Young's modulus       | Elongation at break   | Fracture/Ultimate Strength | Toughness |
|----------------------------------------------------------|-----------------------|-----------------------|----------------------------|-----------|
| All conditions (Resin, rHEMA, rEHA, gResin, gHEMA, gEHA) | $1.2 \times 10^{-21}$ | $5.9 \times 10^{-16}$ | $2.1 \times 10^{-12}$      | 0.06      |
| Resin, rHEMA, rEHA                                       | $5.8 \times 10^{-5}$  | 0.67                  | 0.01                       | 0.06      |
| gResin, gHEMA, gEHA                                      | 0.03                  | $2.0 \times 10^{-3}$  | $1.4 \times 10^{-3}$       | 0.10      |
| gHEMA, gEHA                                              |                       |                       | $2.5 \times 10^{-3}$       |           |

**Table S3.** Summary of mechanical properties of printed neat and glass microsphere-filled samples. For each formulation, standard deviations are calculated based on the results from 5 samples.

|                         | <b>Young's<br/>Modulus (MPa)</b> | <b>Elongation at<br/>Break (%)</b> | <b>Fracture/Ultime<br/>Strength (MPa)</b> | <b>Toughness<br/>(10<sup>6</sup>·J/m<sup>3</sup>)</b> |
|-------------------------|----------------------------------|------------------------------------|-------------------------------------------|-------------------------------------------------------|
| <b>Resin<br/>(neat)</b> | 0.8 ± 0.1                        | 153.2 ± 9.1                        | 0.92 ± 0.06                               | 0.78 ± 0.01                                           |
| <b>rHEMA</b>            | 0.9 ± 0.1                        | 154.1 ± 9.5                        | 1.00 ± 0.07                               | 0.83 ± 0.13                                           |
| <b>rEHA</b>             | 1.0 ± 0.1                        | 159.1 ± 8.5                        | 1.06 ± 0.04                               | 0.93 ± 0.07                                           |
| <b>gResin</b>           | 6.9 ± 0.6                        | 92.2 ± 8.4                         | 1.22 ± 0.07                               | 0.92 ± 0.14                                           |
| <b>gHEMA</b>            | 8.1 ± 0.7                        | 71.2 ± 2.7                         | 1.51 ± 0.06                               | 0.85 ± 0.05                                           |
| <b>gEHA</b>             | 7.7 ± 0.5                        | 72.1 ± 5.9                         | 1.31 ± 0.08                               | 0.77 ± 0.09                                           |

## Frequency Sweep DMA

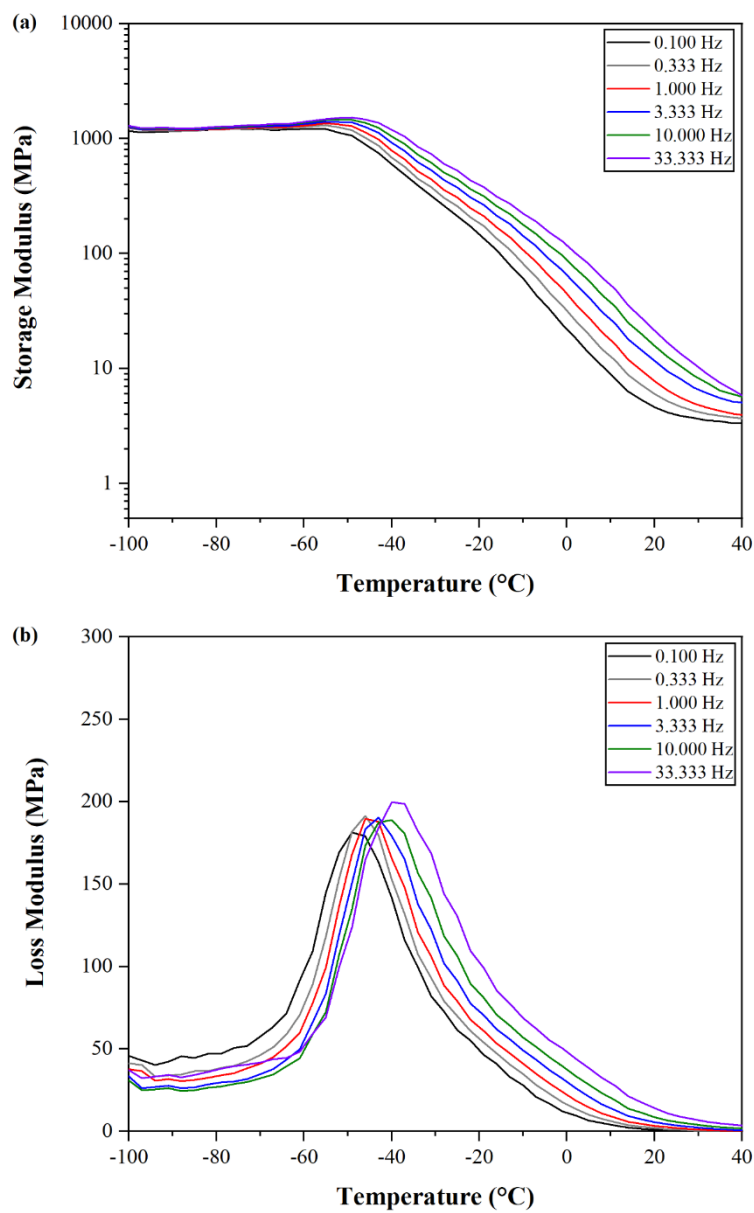

**Figure S2.** DMA frequency sweep results for printed base resin: (a) storage modulus. (b) loss modulus.

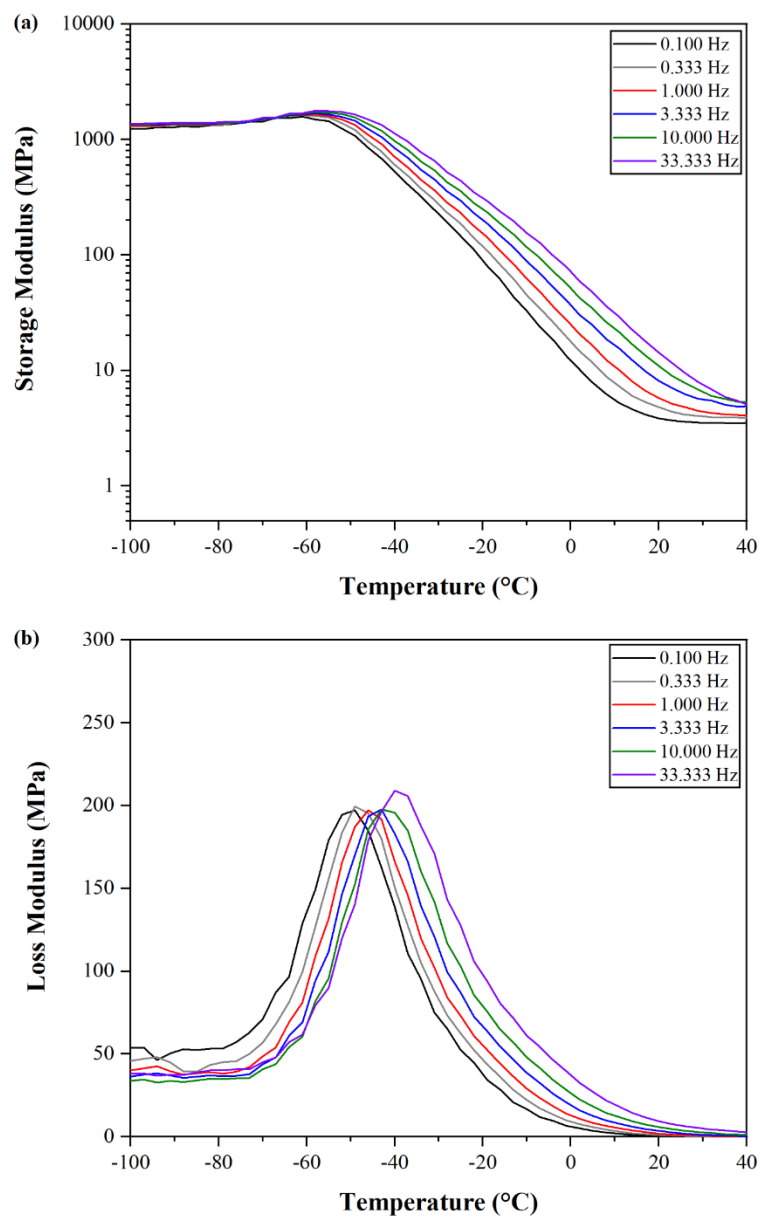

**Figure S3.** DMA frequency sweep results for printed formulated resin with HEMA: (a) storage modulus. (b) loss modulus.

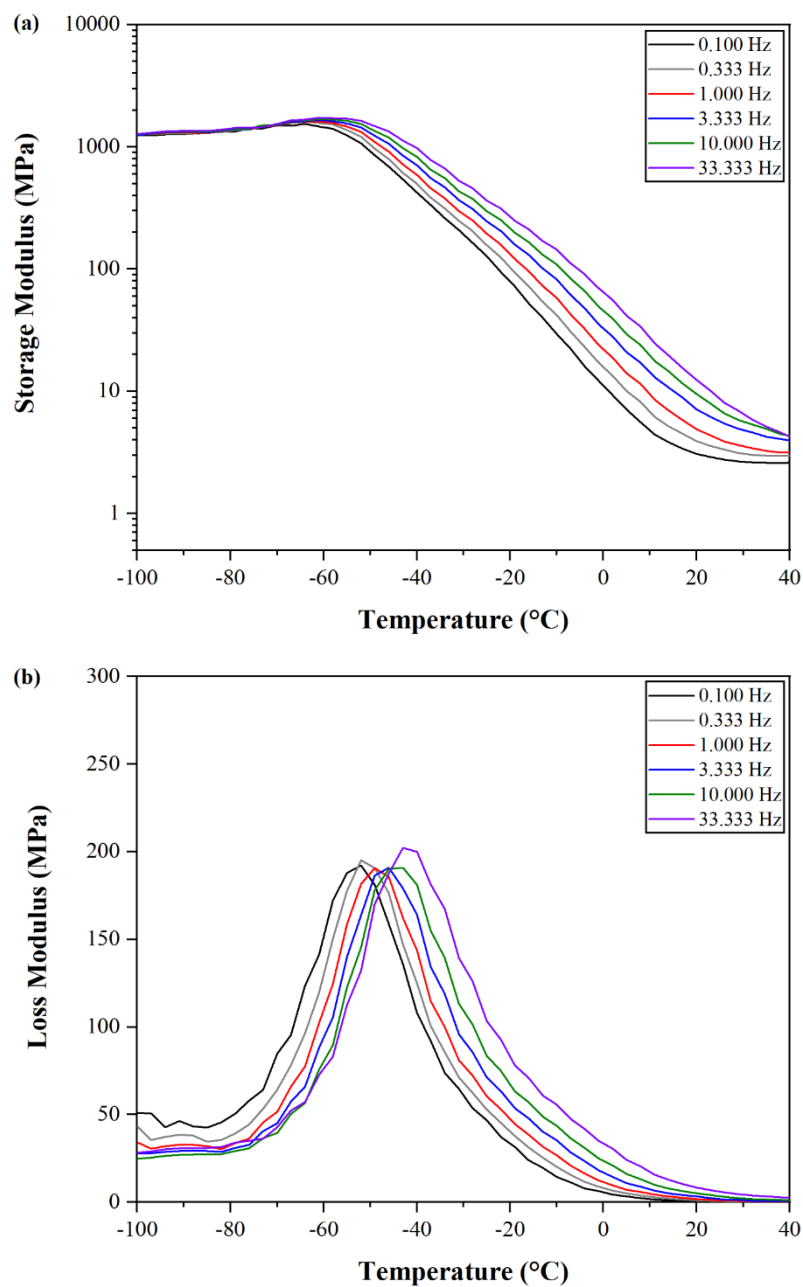

**Figure S4.** DMA frequency sweep results for printed formulated resin with EHA: (a) storage modulus. (b) loss modulus.

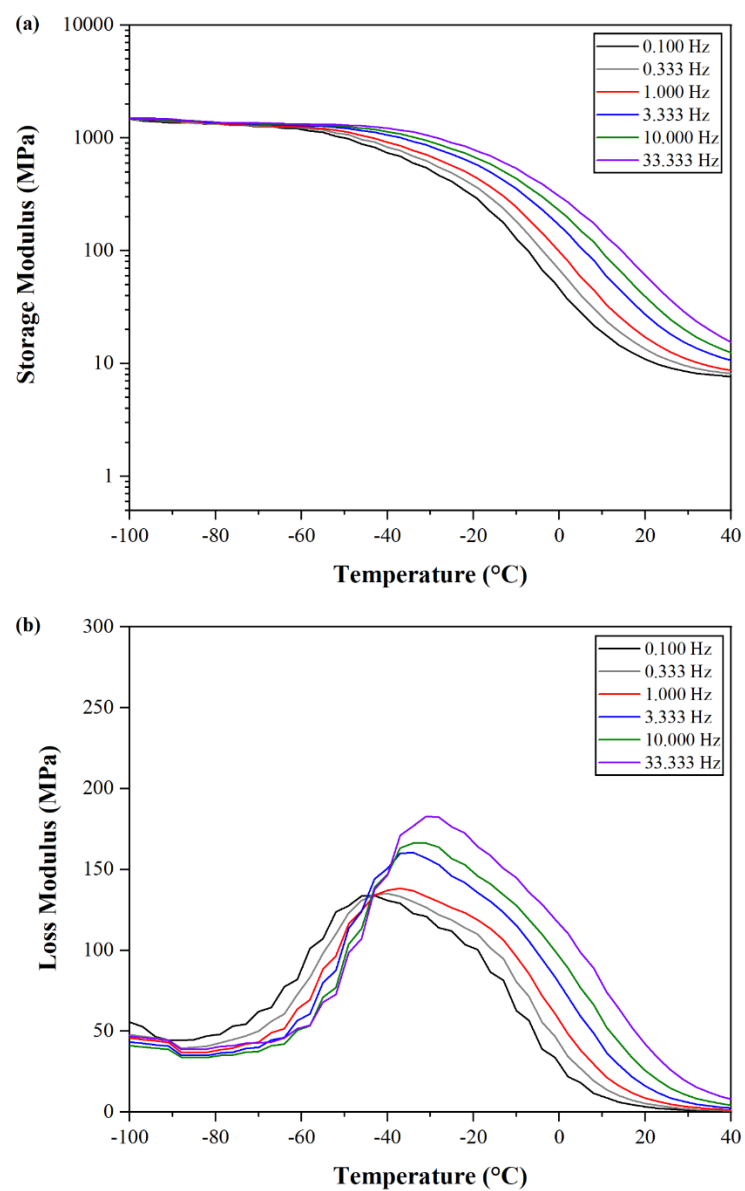

**Figure S5.** DMA frequency sweep results for printed base resin with glass microspheres: (a) storage modulus. (b) loss modulus.

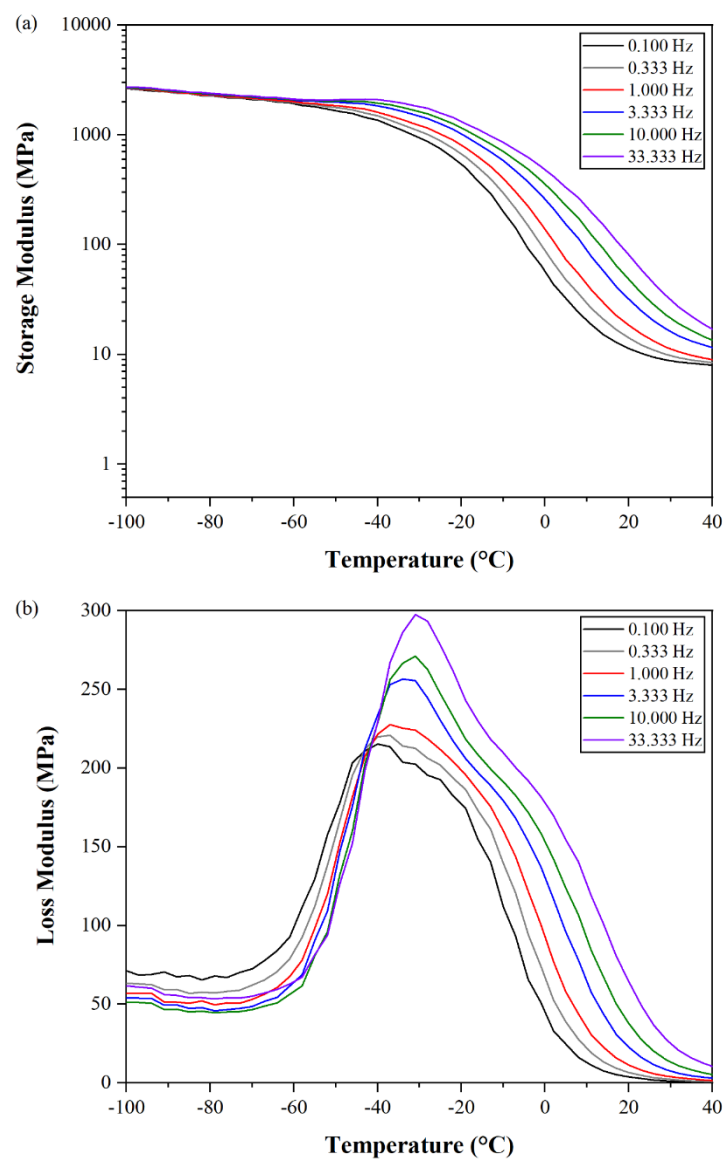

**Figure S6.** DMA frequency sweep results for printed formulated resin with HEMA and glass microspheres: (a) storage modulus. (b) loss modulus.

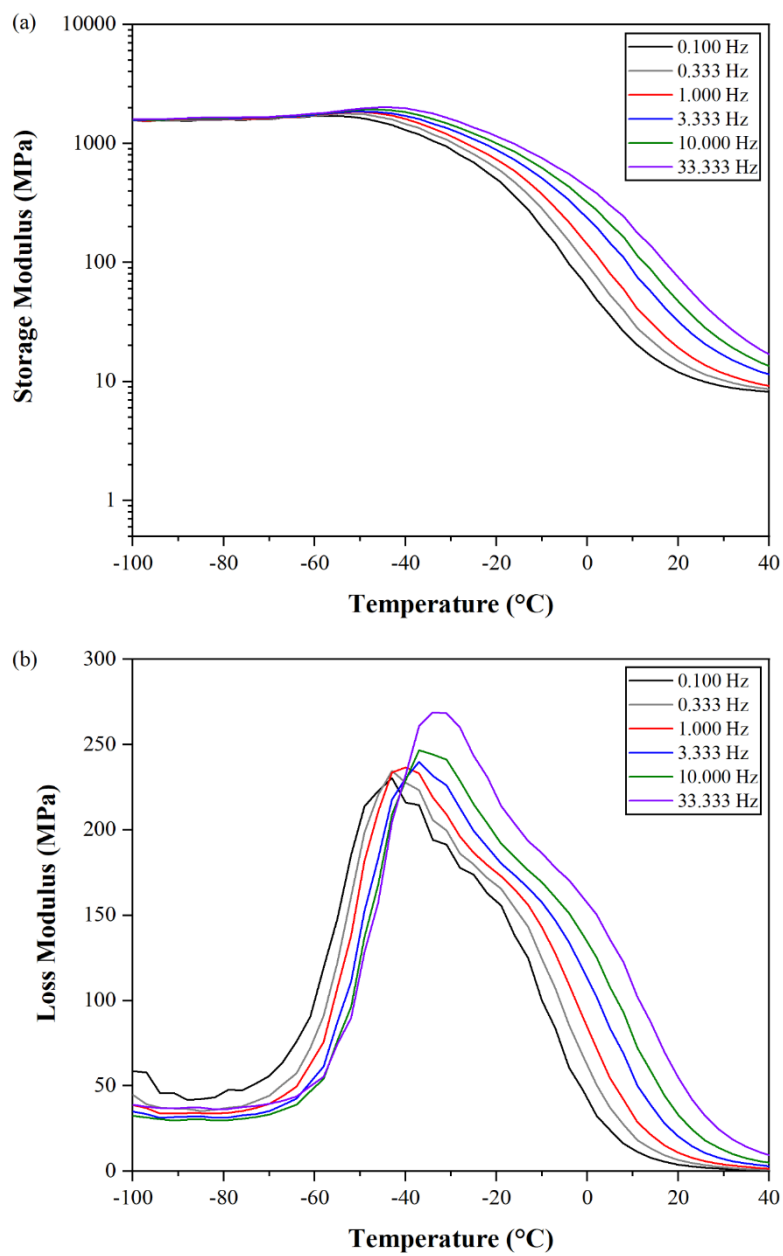

**Figure S7.** DMA frequency sweep results for printed formulated resin with EHA and glass microspheres: (a) storage modulus. (b) loss modulus.

## Designs of printed structures

The resolution print design with vertical walls and trenches was inspired and created following previous work from Shah et al.<sup>1</sup>

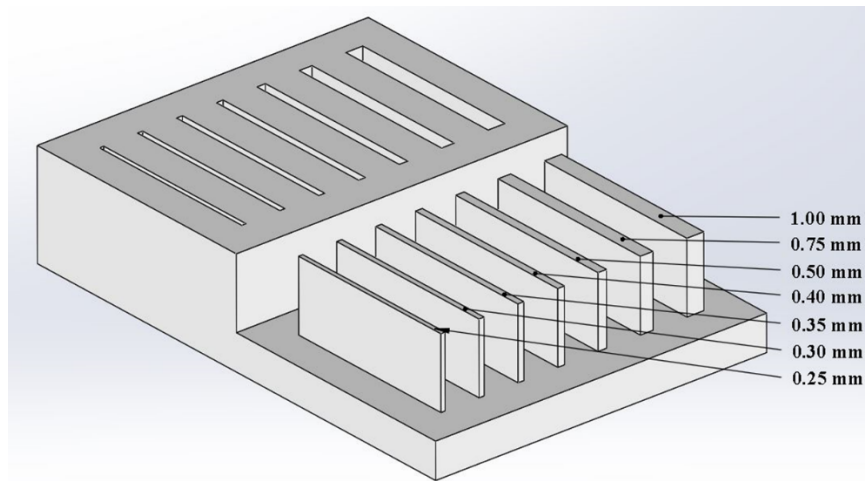

**Figure S8.** CAD file of resolution print with vertical walls and trenches.

(a)

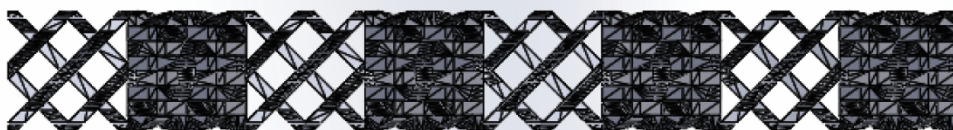

(b)

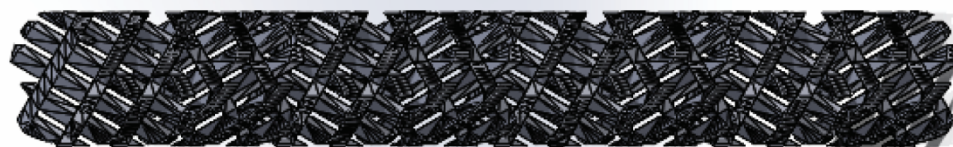

**Figure S9.** CAD file of mixing element. (a) side view; (b) isometric view.

- (1) Shah, D. M.; Morris, J.; Plaisted, T. A.; Amirkhizi, A. V.; Hansen, C. J. Highly Filled Resins for DLP-Based Printing of Low Density, High Modulus Materials. *Addit. Manuf.* **2021**, 37 (August 2020), 101736. <https://doi.org/10.1016/j.addma.2020.101736>.
